# Supplementary material for: Neurocognitive function among HIV-infected children on protease inhibitor -based versus non-protease inhibitor based antiretroviral therapy in Uganda: a pilot study
Source: Springer Nature journal article supplement (doi:10.1186/s12887-021-02676-2), 2021-04-26
Supplement: MOESM1 [file 19106618]

**Neurocognitive Function Among HIV Infected Children On Protease Inhibitor Based Versus Non Protease Inhibitor Based Antiretroviral Therapy  
Questionnaire Version 1.0  
October 2018**

Study ID

Page 1 of 6

Complete this medical history and physical examination form at the enrolment of study participants.

**PARTICULARS**

|                                                                                                                                                                                                                     |                                                  |                                                                          |
|---------------------------------------------------------------------------------------------------------------------------------------------------------------------------------------------------------------------|--------------------------------------------------|--------------------------------------------------------------------------|
| 1. Date of enrolment DD/MM/YR:<br>___/___/___                                                                                                                                                                       | 2. Child's Initials: _____                       | 3. Sex: Male <input type="checkbox"/><br>Female <input type="checkbox"/> |
| 4. Child's date of birth<br>DD/MM/YR: ___/___/___                                                                                                                                                                   | 5. Child's Age<br>(Completed years):             | 6. District of Residence:                                                |
| 7. Child's years of school (Completed years):<br>_____ years                                                                                                                                                        | 8. Caregiver's Relationship with child:<br>_____ |                                                                          |
| 9. Caregiver's Education level: None <input type="checkbox"/><br>Primary <input type="checkbox"/><br>Secondary <input type="checkbox"/><br>Tertiary <input type="checkbox"/><br>Don't know <input type="checkbox"/> |                                                  |                                                                          |

**PRESENT HEALTH HISTORY**

|                                                                                                                                                                                                                          |                                   |                                       |
|--------------------------------------------------------------------------------------------------------------------------------------------------------------------------------------------------------------------------|-----------------------------------|---------------------------------------|
| 10. Is the patient currently ill with any of the following symptoms: Fever, vomiting, severe diarrhoea, active convulsions, difficulty breathing, severe cough?<br>N <input type="checkbox"/> Y <input type="checkbox"/> |                                   |                                       |
| <i>If Y, send to Medical staff of JCRC for evaluation. If N, continue with enrolment</i>                                                                                                                                 |                                   |                                       |
| <b><u>HIV TREATMENT HISTORY</u></b>                                                                                                                                                                                      |                                   |                                       |
| 11. Child, combination:                                                                                                                                                                                                  | PI-based <input type="checkbox"/> | Non-PI based <input type="checkbox"/> |
| 12. Adherence: How many doses have you missed in the last 3 days? _____ doses                                                                                                                                            |                                   |                                       |
| 13. ART initiation date DD/MM/YR: ___/___/___                                                                                                                                                                            |                                   |                                       |
| 14. WHO clinical staging at ART initiation: I <input type="checkbox"/> II <input type="checkbox"/> III <input type="checkbox"/><br>IV <input type="checkbox"/>                                                           |                                   |                                       |
| 15. Is the child on O.I prophylaxis?                                                                                                                                                                                     | N <input type="checkbox"/>        | Y <input type="checkbox"/>            |
| 16. If Y, list medications:                                                                                                                                                                                              |                                   |                                       |

**Neurocognitive Function Among HIV Infected Children On Protease Inhibitor Based Versus Non Protease Inhibitor Based Antiretroviral Therapy**  
**Questionnaire Version 1.0**  
**October 2018**

Study ID

|  |
|--|
|  |
|--|

**PAST MEDICAL HISTORY**

|                                                                        |       |       |
|------------------------------------------------------------------------|-------|-------|
| <b>Has the child:</b>                                                  |       |       |
| 17. Any other medical condition apart from HIV?                        | N [ ] | Y [ ] |
| 18. If yes list condition: _____                                       |       |       |
| 19. Been hospitalized for malnutrition?                                | N [ ] | Y [ ] |
| 20. Been hospitalized with coma?                                       | N [ ] | Y [ ] |
| 21. Been hospitalized meningitis?                                      | N [ ] | Y [ ] |
| 22. Been hospitalized with head injury?                                | N [ ] | Y [ ] |
| <b>If Yes for any of the above conditions, exclude from the study.</b> |       |       |
| 23. Been hospitalised for reasons other than those listed above?       | N [ ] | Y [ ] |
| 24. If yes, reason for the hospitalization: _____                      |       |       |

**EARLY HEALTH HISTORY**

|                                                                              |       |       |
|------------------------------------------------------------------------------|-------|-------|
| 25. Was child born before term?                                              | N [ ] | Y [ ] |
| <b>If yes;</b>                                                               |       |       |
| 26. How many months early? _____ (completed) months                          |       |       |
| 27. Birth weight in kilograms? _____ Kg                                      |       |       |
| 28. For how long was the child received breast fed? _____ (completed) months |       |       |

**PHYSICAL EXAMINATION**

29. Temp \_\_\_\_ . \_\_\_\_ ° C                      30. Weight. \_\_\_\_ . \_\_\_\_ kg                      31. Height. \_\_\_\_ cm.  
 32. MUAC \_\_\_\_ . \_\_\_\_ cm

33. Is the child acutely ill by screening exam?                      N [ ]                      Y [ ]

**If yes:**

***Stop enrolment and refer to staff of JCRC for evaluation and treatment***

**GENERAL ASSESSMENT OF THE CHILD**

34. General exam normal?                      N [ ]                      Y [ ]

35. If no, describe: \_\_\_\_\_

36. Respiratory system normal?                      N [ ]                      Y [ ]

37. If no, describe: \_\_\_\_\_

38. Cardiovascular system normal?                      N [ ]                      Y [ ]

39. If no, describe: \_\_\_\_\_

**Neurocognitive Function Among HIV Infected Children On Protease Inhibitor  
Based Versus Non Protease Inhibitor Based Antiretroviral Therapy  
Questionnaire Version 1.0  
October 2018**

**Study ID** |\_|\_|\_|\_|\_|

Page 3 of 6

40. GIT system normal?                      N [ ]                      Y [ ]

41. If no, describe: \_\_\_\_\_

42. CNS examination normal?              N [ ]                      Y [ ]

43. If no,  
describe: \_\_\_\_\_

44. Other findings                              N [ ]                      Y [ ]

45. *If yes*, describe: \_\_\_\_\_

**NEURODEVELOPMENTAL SCREEN (TQQ)**

46. Compared to other children, did your child delay in sitting, standing or walking?

N [ ]                      Y [ ]

47. Compared to other children, does your child have difficulty seeing at night or during the day? N [ ]                      Y [ ]

48. Does your child seem to have difficulties hearing?

N [ ]                      Y [ ]

49. Does your child understand instructions?

N [ ]                      Y [ ]

50. Does your child have any difficulty walking, moving his/her hands, weakness or stiffness in the hands and legs?

N [ ]                      Y [ ]

51. Has your child ever had seizures or go into coma?

N [ ]                      Y [ ]

52. Did your child learn how to do things at the same time as his/her age mates?

N [ ]                      Y [ ]

53. Does your child speak?

N [ ]                      Y [ ]

**If Yes:**

54. Does he/she speak clearly?

N [ ]                      Y [ ]

55. Does he/she speak some things you can't understand at times?

N [ ]                      Y [ ]

56. When compared to other children of his/her age, is his/her intelligence poorer, is he/she retarded or does he/she take long to understand?

N [ ]                      Y [ ]

**Done by** \_\_\_\_\_

**Date** \_\_\_\_\_

**Neurocognitive Function Among HIV Infected Children On Protease Inhibitor Based Versus Non Protease Inhibitor Based Antiretroviral Therapy**  
**Questionnaire Version 1.0**  
**October 2018**

Study ID

| <b>Neurocognitive Function Among HIV Infected Children On Protease Inhibitor Based Versus Non Protease Inhibitor Based Antiretroviral Therapy</b> |                            |                                                                            |                                      |                                               |                                     |                                       |                            |                            |                            |                             |                             |                             |                              |
|---------------------------------------------------------------------------------------------------------------------------------------------------|----------------------------|----------------------------------------------------------------------------|--------------------------------------|-----------------------------------------------|-------------------------------------|---------------------------------------|----------------------------|----------------------------|----------------------------|-----------------------------|-----------------------------|-----------------------------|------------------------------|
| <b>Social Economic Status Form (1 Page)</b>                                                                                                       |                            |                                                                            |                                      |                                               |                                     |                                       |                            |                            |                            |                             |                             |                             |                              |
| Study ID:<br> _ _ / _ _ / _ _ / _ _ / _ _                                                                                                         |                            | Date (DD/MM/YYYY):<br> _ _ / _ _ / _ _ / _ _ / _ _ / _ _ / _ _ / _ _ / _ _ |                                      |                                               |                                     |                                       |                            |                            |                            |                             |                             |                             |                              |
| <b>EDUCATION</b>                                                                                                                                  |                            |                                                                            |                                      |                                               |                                     |                                       |                            |                            |                            |                             |                             |                             |                              |
| 1. Is the child currently in school?                                                                                                              |                            | <input type="checkbox"/> YES                                               | <input type="checkbox"/> NO          |                                               |                                     |                                       |                            |                            |                            |                             |                             |                             |                              |
| 2. If YES, child is in school, what level?                                                                                                        |                            | <input type="checkbox"/> 0-none                                            | <input type="checkbox"/> 1-preschool | <input type="checkbox"/> 2-nursery            | <input type="checkbox"/> 3-P.1-P4   | <input type="checkbox"/> 4-P.5-P7     |                            |                            |                            |                             |                             |                             |                              |
| 3. If NO, was child ever in school?                                                                                                               |                            | <input type="checkbox"/> YES                                               | <input type="checkbox"/> NO          |                                               |                                     |                                       |                            |                            |                            |                             |                             |                             |                              |
| 4. If YES, child WAS in school, what level?                                                                                                       |                            | <input type="checkbox"/> 0-none                                            | <input type="checkbox"/> 1-preschool | <input type="checkbox"/> 2-nursery            | <input type="checkbox"/> 3-P.1-P.4  | <input type="checkbox"/> 4-P.5-P7     |                            |                            |                            |                             |                             |                             |                              |
| 5. Who is the child's primary caregiver?                                                                                                          |                            | <input type="checkbox"/> Father                                            | <input type="checkbox"/> Mother      | <input type="checkbox"/> Other, specify _____ |                                     |                                       |                            |                            |                            |                             |                             |                             |                              |
| 6. Is child's mother able to read and write?                                                                                                      |                            | <input type="checkbox"/> YES                                               | <input type="checkbox"/> NO          |                                               |                                     |                                       |                            |                            |                            |                             |                             |                             |                              |
| 7. What was the highest level of education for the child's primary care giver?                                                                    |                            | <input type="checkbox"/> 0-none                                            | <input type="checkbox"/> 1-primary   | <input type="checkbox"/> 2-secondary          | <input type="checkbox"/> 3-tertiary |                                       |                            |                            |                            |                             |                             |                             |                              |
| 8. Is child's father able to read and write?                                                                                                      |                            | <input type="checkbox"/> YES                                               | <input type="checkbox"/> NO          | <input type="checkbox"/> Don't know           |                                     |                                       |                            |                            |                            |                             |                             |                             |                              |
| 9. What was highest level of education for child's father?                                                                                        |                            | <input type="checkbox"/> 0-none                                            | <input type="checkbox"/> 1-primary   | <input type="checkbox"/> 2-secondary          | <input type="checkbox"/> 3-tertiary | <input type="checkbox"/> 4-don't know |                            |                            |                            |                             |                             |                             |                              |
| <b>Socio-Economic Status</b>                                                                                                                      |                            |                                                                            |                                      |                                               |                                     |                                       |                            |                            |                            |                             |                             |                             |                              |
| 1. How many siblings does this child have?                                                                                                        |                            |                                                                            |                                      |                                               |                                     |                                       |                            |                            |                            |                             |                             |                             |                              |
| <input type="checkbox"/> 0                                                                                                                        | <input type="checkbox"/> 1 | <input type="checkbox"/> 2                                                 | <input type="checkbox"/> 3           | <input type="checkbox"/> 4                    | <input type="checkbox"/> 5          | <input type="checkbox"/> 6            | <input type="checkbox"/> 7 | <input type="checkbox"/> 8 | <input type="checkbox"/> 9 | <input type="checkbox"/> 10 | <input type="checkbox"/> 11 | <input type="checkbox"/> 12 | <input type="checkbox"/> >12 |
| 2. How many people live under the same roof as this child?                                                                                        |                            |                                                                            |                                      |                                               |                                     |                                       |                            |                            |                            |                             |                             |                             |                              |

**Neurocognitive Function Among HIV Infected Children On Protease Inhibitor Based Versus Non Protease Inhibitor Based Antiretroviral Therapy**  
**Questionnaire Version 1.0**  
**October 2018**

Study ID

Page 5 of 6

| <b>Neurocognitive Function Among HIV Infected Children On Protease Inhibitor Based Versus Non Protease Inhibitor Based Antiretroviral Therapy</b> |                            |                              |                             |                                             |                            |                                 |                                        |                              |                                     |                             |                                                    |                             |                              |  |
|---------------------------------------------------------------------------------------------------------------------------------------------------|----------------------------|------------------------------|-----------------------------|---------------------------------------------|----------------------------|---------------------------------|----------------------------------------|------------------------------|-------------------------------------|-----------------------------|----------------------------------------------------|-----------------------------|------------------------------|--|
| <input type="checkbox"/> 0                                                                                                                        | <input type="checkbox"/> 1 | <input type="checkbox"/> 2   | <input type="checkbox"/> 3  | <input type="checkbox"/> 4                  | <input type="checkbox"/> 5 | <input type="checkbox"/> 6      | <input type="checkbox"/> 7             | <input type="checkbox"/> 8   | <input type="checkbox"/> 9          | <input type="checkbox"/> 10 | <input type="checkbox"/> 11                        | <input type="checkbox"/> 12 | <input type="checkbox"/> >12 |  |
| <b>3. What type of roof do you have?</b>                                                                                                          |                            |                              |                             | <input type="checkbox"/> 1-Thatch           |                            |                                 | <input type="checkbox"/> 2-Iron sheets |                              | <input type="checkbox"/> 3-Tiles    |                             | <input type="checkbox"/> 4-Don't know              |                             |                              |  |
| <b>4. What kind of water supply do you have?</b>                                                                                                  |                            |                              |                             | <input type="checkbox"/> 1-Stream/pond/lake |                            |                                 | <input type="checkbox"/> 2-Well        |                              | <input type="checkbox"/> 3-Borehole |                             | <input type="checkbox"/> 4-Tap near or inside home |                             |                              |  |
| <b>5. What kind of cooking fuel do you use?</b>                                                                                                   |                            |                              |                             | <input type="checkbox"/> 1-Firewood         |                            |                                 | <input type="checkbox"/> 2-Charcoal    |                              | <input type="checkbox"/> 3-Paraffin |                             | <input type="checkbox"/> 4-Gas/Electricity         |                             |                              |  |
| <b>6. Does the family eat meat at least once a week?</b>                                                                                          |                            |                              |                             | <input type="checkbox"/> YES                |                            |                                 | <input type="checkbox"/> NO            |                              |                                     |                             |                                                    |                             |                              |  |
| <b>7. Does the family have food all year round?</b>                                                                                               |                            |                              |                             | <input type="checkbox"/> YES                |                            |                                 | <input type="checkbox"/> NO            |                              |                                     |                             |                                                    |                             |                              |  |
| <b>8. Which of the following items are owned by you or found in your home? Add scores for YES responses for total</b>                             |                            |                              |                             |                                             |                            |                                 |                                        |                              |                                     |                             |                                                    |                             |                              |  |
| Item                                                                                                                                              |                            |                              |                             | Score                                       |                            | Item                            |                                        |                              |                                     | Score                       |                                                    |                             |                              |  |
| Electricity                                                                                                                                       |                            | <input type="checkbox"/> YES | <input type="checkbox"/> NO | 3                                           |                            | Bicycle                         |                                        | <input type="checkbox"/> YES | <input type="checkbox"/> NO         | 1                           |                                                    |                             |                              |  |
| Shoes for subject                                                                                                                                 |                            | <input type="checkbox"/> YES | <input type="checkbox"/> NO | 1                                           |                            | Motorcycle                      |                                        | <input type="checkbox"/> YES | <input type="checkbox"/> NO         | 2                           |                                                    |                             |                              |  |
| Radio                                                                                                                                             |                            | <input type="checkbox"/> YES | <input type="checkbox"/> NO | 1                                           |                            | Motor vehicle                   |                                        | <input type="checkbox"/> YES | <input type="checkbox"/> NO         | 3                           |                                                    |                             |                              |  |
| Television                                                                                                                                        |                            | <input type="checkbox"/> YES | <input type="checkbox"/> NO | 2                                           |                            | Animals (>2: cows, goats, pigs) |                                        | <input type="checkbox"/> YES | <input type="checkbox"/> NO         | 2                           |                                                    |                             |                              |  |
|                                                                                                                                                   |                            |                              |                             |                                             |                            | Poultry >10                     |                                        | <input type="checkbox"/> YES | <input type="checkbox"/> NO         | 2                           |                                                    |                             |                              |  |
| <b>TOTAL (add scores from both columns of all YES responses)</b>                                                                                  |                            |                              |                             |                                             |                            | _ _ / _ _                       |                                        |                              |                                     |                             |                                                    |                             |                              |  |
| <b>MIGRATION</b>                                                                                                                                  |                            |                              |                             |                                             |                            |                                 |                                        |                              |                                     |                             |                                                    |                             |                              |  |
| <b>In which district was the subject born?</b>                                                                                                    |                            |                              |                             | <b>District:</b>                            |                            |                                 |                                        |                              |                                     |                             |                                                    |                             |                              |  |

**Neurocognitive Function Among HIV Infected Children On Protease Inhibitor Based Versus Non Protease Inhibitor Based Antiretroviral Therapy**  
**Questionnaire Version 1.0**  
**October 2018**

Study ID

Page 6 of 6

| <i>Neurocognitive Function Among HIV Infected Children On Protease Inhibitor Based Versus Non Protease Inhibitor Based Antiretroviral Therapy</i> |                                                                                                                                                                                                                   |                  |                      |
|---------------------------------------------------------------------------------------------------------------------------------------------------|-------------------------------------------------------------------------------------------------------------------------------------------------------------------------------------------------------------------|------------------|----------------------|
| <i>In which district has the child lived for most of life?</i>                                                                                    | <i>District:</i>                                                                                                                                                                                                  |                  |                      |
| <i>In which district did the subject usually live for past 12 months?</i>                                                                         | <i>District:</i>                                                                                                                                                                                                  |                  |                      |
| <b>FORM COMPLETED BY:</b>                                                                                                                         | <input type="text"/> <input type="text"/> <input type="text"/> <input type="text"/> <input type="text"/>                                                                                                          | <b>SIGNATURE</b> | <input type="text"/> |
| <b>DATE (DD/MM/YYYY)</b>                                                                                                                          | <input type="text"/> |                  |                      |
